# Supplementary material
Source: Springer Nature journal article supplement (https://www.springermedizin.de/resource/supplementary/12883_2013_867_MOESM1_ESM.pdf/9456032)

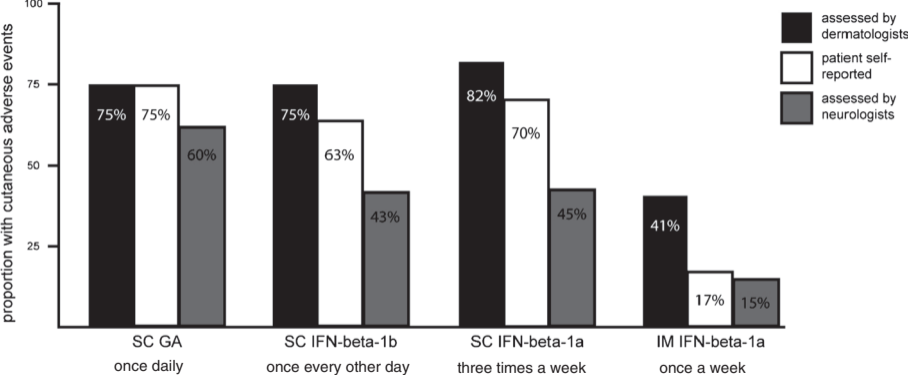

Overall  $P < 0.001$  (Chi square test); IM IFN- $\beta$ -1a vs. other DMTs:  $P < 0.001$  (Chi square test).

Supplement: MOESM1 [file 9456032]
